# Supplementary material
Source: MDPI journal article supplement (https://www.mdpi.com/2072-4292/11/24/3053)
Supplement: s1 [file s1]

## Sheet: Data for model
Nb of cases	AREA LU-LC[m2]	AREA LU-LC	Ln AREA LU-LC (according to tab. 1)	LAND COVER (description in tab. 1)	UA (description in tab. 1)	GEOloc (description in tab. 1)
1	1	1	0	1	2	15
2	1	1	0	1	2	16
3	1	1	0	1	2	53
4	1	1	0	1	2	53
5	1	1	0	1	2	53
6	1	1	0	1	2	53
7	1	1	0	1	2	53
8	1	1	0	1	2	53
9	1	1	0	1	1	58
10	1	1	0	1	1	58
11	1	1	0	1	1	58
12	1	1	0	1	1	58
13	1	1	0	1	1	58
14	1	1	0	1	1	63
15	1	1	0	1	2	65
16	1	1	0	1	2	65
17	1	1	0	1	1	65
18	1	1	0	1	2	65
19	2	1	0	1	2	53
20	2	1	0	1	2	53
21	2	1	0	1	2	58
22	2	1	0	1	1	58
23	2	1	0	1	2	58
24	2	1	0	1	2	63
25	2	1	0	1	2	65
26	2	1	0	1	1	65
27	3	1	0	1	2	53
28	3	1	0	1	2	57
29	3	1	0	1	1	58
30	3	1	0	1	1	58
31	3	1	0	1	1	58
32	3	1	0	1	1	59
33	3	1	0	2	1	65
34	3	1	0	1	1	65
35	4	1	0	1	2	16
36	4	1	0	1	2	53
37	4	1	0	1	1	58
38	4	1	0	1	2	58
39	4	1	0	1	1	59
40	4	1	0	1	3	59
41	4	1	0	1	1	63
42	4	1	0	1	1	65
43	5	1	0	1	1	15
44	5	1	0	1	2	16
45	5	1	0	1	2	22
46	5	1	0	1	2	53
47	5	1	0	1	2	57
48	5	1	0	1	1	57
49	5	1	0	1	1	58
50	5	1	0	1	1	58
51	5	1	0	1	1	65
52	6	1	0	1	2	15
53	6	1	0	1	1	58
54	6	1	0	1	1	59
55	7	1	0	1	2	16
56	7	1	0	1	1	16
57	7	1	0	1	2	57
58	7	1	0	1	2	58
59	7	1	0	1	1	58
60	7	1	0	2	1	58
61	7	1	0	2	1	58
62	7	1	0	1	1	65
63	8	1	0	1	2	16
64	8	1	0	1	2	57
65	8	1	0	1	1	58
66	8	1	0	1	1	58
67	8	1	0	1	2	58
68	8	1	0	1	3	59
69	8	1	0	1	1	65
70	8	1	0	1	1	65
71	8	1	0	2	1	65
72	9	1	0	1	2	22
73	9	1	0	1	1	58
74	9	1	0	1	2	58
75	9	1	0	1	1	58
76	9	1	0	1	1	65
77	10	1	0	1	2	15
78	10	1	0	1	2	22
79	10	1	0	1	2	57
80	10	1	0	1	2	58
81	10	1	0	1	1	58
82	10	1	0	1	2	65
83	10	1	0	2	1	65
84	10	1	0	2	1	65
85	10	1	0	1	1	65
86	11	1	0	1	2	16
87	11	1	0	1	2	16
88	11	1	0	1	2	16
89	11	1	0	1	2	53
90	11	1	0	1	1	58
91	11	1	0	1	1	58
92	11	1	0	1	1	58
93	12	1	0	1	2	22
94	12	1	0	1	2	53
95	12	1	0	1	2	53
96	12	1	0	1	1	57
97	12	1	0	1	1	57
98	12	1	0	1	2	58
99	12	1	0	1	2	58
100	12	1	0	2	1	58
101	13	1	0	1	2	16
102	13	1	0	1	2	16
103	13	1	0	1	2	22
104	13	1	0	1	2	22
105	13	1	0	1	2	57
106	13	1	0	1	2	57
107	13	1	0	1	2	58
108	13	1	0	2	2	58
109	13	1	0	1	1	58
110	13	1	0	3	2	65
111	14	1	0	1	1	15
112	14	1	0	1	2	15
113	14	1	0	1	2	22
114	14	1	0	1	1	57
115	14	1	0	1	2	58
116	14	1	0	1	2	58
117	14	1	0	1	1	58
118	14	1	0	1	1	65
119	15	1	0	1	2	22
120	15	1	0	1	2	57
121	15	1	0	1	2	58
122	15	1	0	3	1	58
123	16	1	0	1	1	16
124	16	1	0	2	1	58
125	16	1	0	1	1	65
126	17	1	0	1	2	22
127	17	1	0	1	2	57
128	17	1	0	2	1	58
129	17	1	0	1	1	65
130	18	1	0	1	2	15
131	18	1	0	1	2	57
132	18	1	0	1	2	57
133	18	1	0	2	2	57
134	19	1	0	1	2	16
135	19	1	0	1	2	22
136	19	1	0	1	2	57
137	21	1	0	1	2	58
138	21	1	0	1	1	65
139	21	1	0	1	1	65
140	22	1	0	1	2	22
141	22	1	0	1	1	65
142	22	1	0	2	1	65
143	23	1	0	1	2	57
144	23	1	0	1	2	57
145	23	1	0	2	2	65
146	23	1	0	2	1	65
147	24	1	0	1	2	15
148	24	1	0	1	1	65
149	25	1	0	1	2	57
150	25	1	0	1	2	65
151	25	1	0	2	1	65
152	26	1	0	1	1	15
153	26	1	0	1	2	15
154	26	1	0	2	1	58
155	27	1	0	1	2	15
156	27	1	0	1	3	22
157	27	1	0	1	1	59
158	27	1	0	2	1	63
159	28	1	0	1	1	57
160	28	1	0	2	2	58
161	29	1	0	1	2	22
162	30	1	0	2	2	65
163	31	1	0	1	2	16
164	32	1	0	1	2	22
165	32	1	0	1	2	57
166	32	1	0	1	2	57
167	32	1	0	1	2	57
168	33	1	0	1	2	16
169	34	1	0	1	1	15
170	34	1	0	2	1	65
171	35	1	0	1	2	15
172	35	1	0	2	1	16
173	36	1	0	1	2	57
174	36	1	0	2	2	57
175	36	1	0	2	1	58
176	36	1	0	2	2	65
177	37	1	0	1	1	15
178	37	1	0	1	2	57
179	37	1	0	1	2	65
180	37	1	0	2	1	65
181	38	1	0	1	1	58
182	39	1	0	2	1	15
183	40	1	0	2	1	16
184	41	1	0	1	1	65
185	43	1	0	2	1	58
186	44	1	0	2	1	59
187	45	1	0	1	2	22
188	45	1	0	2	2	57
189	46	1	0	2	2	65
190	47	1	0	2	1	15
191	47	1	0	2	1	16
192	48	1	0	2	1	58
193	48	1	0	2	1	65
194	49	1	0	2	1	58
195	50	1	0	2	1	59
196	51	1	0	1	1	16
197	54	1	0	1	2	16
198	54	1	0	2	2	22
199	54	1	0	2	2	22
200	55	1	0	2	1	15
201	56	1	0	2	2	57
202	56	1	0	2	1	57
203	58	1	0	2	1	65
204	59	1	0	2	1	58
205	59	1	0	2	2	58
206	60	1	0	2	2	65
207	64	1	0	1	2	15
208	64	1	0	1	1	58
209	64	1	0	2	1	65
210	64	1	0	1	1	65
211	65	1	0	1	2	16
212	65	1	0	2	2	57
213	65	1	0	3	3	65
214	68	1	0	2	1	58
215	69	1	0	2	1	15
216	69	1	0	2	2	57
217	69	1	0	2	1	57
218	70	1	0	1	1	15
219	70	1	0	1	2	15
220	70	1	0	1	2	57
221	70	1	0	2	1	57
222	70	1	0	2	1	57
223	70	1	0	2	1	58
224	71	1	0	2	1	15
225	71	1	0	2	2	57
226	72	1	0	2	1	15
227	72	1	0	2	2	22
228	72	1	0	2	1	58
229	72	1	0	2	1	65
230	73	1	0	1	2	22
231	75	1	0	2	2	57
232	76	1	0	1	1	15
233	76	1	0	1	2	57
234	76	1	0	2	1	65
235	76	1	0	2	1	65
236	77	1	0	2	1	58
237	77	1	0	3	3	65
238	79	1	0	1	2	16
239	79	1	0	2	2	65
240	81	1	0	2	1	15
241	82	1	0	2	2	57
242	82	1	0	2	1	58
243	83	1	0	2	1	58
244	84	1	0	2	1	15
245	85	1	0	1	1	58
246	86	1	0	2	1	57
247	87	1	0	1	1	16
248	88	1	0	1	3	58
249	89	1	0	2	2	65
250	90	1	0	2	2	16
251	92	1	0	2	2	22
252	93	1	0	3	2	57
253	93	1	0	3	2	57
254	95	1	0	2	1	65
255	97	1	0	2	1	15
256	99	1	0	2	1	15
257	99	1	0	2	1	58
258	99	1	0	1	2	58
259	100	2	0.69347	2	1	58
260	101	2	0.69347	2	2	16
261	102	2	0.69347	1	2	16
262	102	2	0.69347	1	2	58
263	107	2	0.69347	2	1	58
264	110	2	0.69347	2	1	15
265	111	2	0.69347	1	2	57
266	111	2	0.69347	1	2	57
267	112	2	0.69347	2	1	15
268	114	2	0.69347	2	1	58
269	114	2	0.69347	2	2	65
270	115	2	0.69347	2	1	15
271	116	2	0.69347	2	1	16
272	122	2	0.69347	2	1	15
273	124	2	0.69347	2	1	58
274	125	2	0.69347	2	2	65
275	127	2	0.69347	2	2	65
276	129	2	0.69347	2	1	58
277	130	2	0.69347	1	1	16
278	132	2	0.69347	2	1	57
279	133	2	0.69347	2	2	58
280	144	2	0.69347	2	1	15
281	162	2	0.69347	2	1	58
282	166	2	0.69347	1	2	16
283	167	2	0.69347	2	1	58
284	167	2	0.69347	2	1	58
285	168	2	0.69347	2	2	65
286	176	2	0.69347	2	2	65
287	182	2	0.69347	2	1	15
288	186	2	0.69347	2	1	58
289	187	2	0.69347	1	2	15
290	187	2	0.69347	2	2	58
291	191	2	0.69347	2	2	65
292	203	3	1.09861	2	2	16
293	204	3	1.09861	2	1	15
294	204	3	1.09861	3	3	65
295	228	3	1.09861	3	3	65
296	231	3	1.09861	2	1	15
297	235	3	1.09861	3	3	59
298	236	3	1.09861	2	1	16
299	245	3	1.09861	1	3	58
300	248	3	1.09861	3	3	65
301	254	3	1.09861	2	2	16
302	265	3	1.09861	3	3	65
303	268	3	1.09861	2	2	65
304	275	3	1.09861	3	3	65
305	296	3	1.09861	3	3	65
306	297	3	1.09861	3	3	65
307	300	4	1.38629	3	3	65
308	301	4	1.38629	3	3	65
309	301	4	1.38629	3	3	65
310	310	4	1.38629	2	2	16
311	315	4	1.38629	3	3	65
312	325	4	1.38629	3	3	65
313	327	4	1.38629	1	2	65
314	350	4	1.38629	3	3	51
315	360	4	1.38629	3	3	51
316	393	4	1.38629	3	3	65
317	394	4	1.38629	3	3	65
318	400	5	1.60944	3	3	51
319	440	5	1.60944	3	2	65
320	450	5	1.60944	3	3	65
321	456	5	1.60944	3	3	65
322	463	5	1.60944	3	3	65
323	469	5	1.60944	3	3	65
324	482	5	1.60944	3	3	65
325	495	5	1.60944	3	2	65
326	589	6	1.79176	3	3	65
327	623	6	1.79176	3	3	65
328	718	6	1.79176	3	2	58
329	725	6	1.79176	3	3	51
330	754	6	1.79176	3	3	65
331	836	6	1.79176	3	3	65
332	870	6	1.79176	3	3	51
333	1000	6	1.79176	3	3	51
334	1001	6	1.79176	2	2	16
335	1140	6	1.79176	3	3	51
336	1202	6	1.79176	3	3	65
337	1270	6	1.79176	3	3	51
338	1382	6	1.79176	3	3	65
339	1410	6	1.79176	3	3	51
340	1420	6	1.79176	3	3	51
341	1493	6	1.79176	3	2	22
342	1535	6	1.79176	2	2	65
343	1623	6	1.79176	3	3	51
344	1787	6	1.79176	3	2	22
345	1960	6	1.79176	3	3	51
346	2360	6	1.79176	3	3	51
347	2947	6	1.79176	3	2	22
348	2977	6	1.79176	2	2	16
349	9990	6	1.79176	3	2	22

## Sheet: AIC
AIC	semi-log			liniowa bez progów			line			ln bez progów			lo-log
	e	e*e					e	e*e		reszty			e	e*e
	-0.168282	0.0283187		-173.572	30127.1		-0.358173	0.128288		-3.17473	10.0789		-0.184531	0.0340516
	-0.165984	0.0275506		-168.516	28397.6		-0.352962	0.124582		-3.15477	9.95259		-0.180755	0.0326723
	-0.0809631	0.00655503		18.5398	343.724		-0.160174	0.0256557		-2.41628	5.83841		-0.110678	0.0122496
	-0.0809631	0.00655503		18.5398	343.724		-0.160174	0.0256557		-2.41628	5.83841		-0.110678	0.0122496
	-0.0809631	0.00655503		18.5398	343.724		-0.160174	0.0256557		-2.41628	5.83841		-0.110678	0.0122496
	-0.0809631	0.00655503		18.5398	343.724		-0.160174	0.0256557		-2.41628	5.83841		-0.110678	0.0122496
	-0.0809631	0.00655503		18.5398	343.724		-0.160174	0.0256557		-2.41628	5.83841		-0.110678	0.0122496
	-0.0809631	0.00655503		18.5398	343.724		-0.160174	0.0256557		-2.41628	5.83841		-0.110678	0.0122496
	0.204774	0.0419322		154.076	23739.3		0.594943	0.353957		-2.02235	4.0899		0.242243	0.0586815
	0.204774	0.0419322		154.076	23739.3		0.594943	0.353957		-2.02235	4.0899		0.242243	0.0586815
	0.204774	0.0419322		154.076	23739.3		0.594943	0.353957		-2.02235	4.0899		0.242243	0.0586815
	0.204774	0.0419322		154.076	23739.3		0.594943	0.353957		-2.02235	4.0899		0.242243	0.0586815
	0.204774	0.0419322		154.076	23739.3		0.594943	0.353957		-2.02235	4.0899		0.242243	0.0586815
	0.216263	0.0467696		179.353	32167.6		0.620995	0.385635		-1.92255	3.69621		0.247081	0.061049
	-0.0533889	0.00285037		79.2066	6273.68		-0.097648	0.00953514		-2.17677	4.73832		-0.0987365	0.00974889
	-0.0533889	0.00285037		79.2066	6273.68		-0.097648	0.00953514		-2.17677	4.73832		-0.0987365	0.00974889
	0.220859	0.0487785		189.465	35896.8		0.631416	0.398686		-1.88264	3.54432		0.248909	0.0619559
	-0.0533889	0.00285037		79.2066	6273.68		-0.097648	0.00953514		-2.17677	4.73832		-0.0987365	0.00974889
	-0.0809631	0.00655503		19.5398	381.804		-0.160174	0.0256557		-1.72313	2.96919		-0.110678	0.0122496
	-0.0809631	0.00655503		19.5398	381.804		-0.160174	0.0256557		-1.72313	2.96919		-0.110678	0.0122496
	-0.0694738	0.00482661		44.8176	2008.62		-0.134121	0.0179886		-1.62334	2.63522		-0.105403	0.0111098
	0.204774	0.0419322		155.076	24048.4		0.594943	0.353957		-1.3292	1.76678		0.242243	0.0586815
	-0.0694738	0.00482661		44.8176	2008.62		-0.134121	0.0179886		-1.62334	2.63522		-0.105403	0.0111098
	-0.0579846	0.00336221		70.0954	4913.37		-0.108069	0.0116789		-1.52354	2.32117		-0.100565	0.0101133
	-0.0533889	0.00285037		80.2066	6433.09		-0.097648	0.00953514		-1.48362	2.20113		-0.0987365	0.00974889
	0.220859	0.0487785		190.465	36276.7		0.631416	0.398686		-1.18949	1.41488		0.248909	0.0619559
	-0.0809631	0.00655503		20.5398	421.883		-0.160174	0.0256557		-1.31767	1.73625		-0.110678	0.0122496
	-0.0717717	0.00515118		40.762	1661.54		-0.139332	0.0194134		-1.23783	1.53222		-0.106421	0.0113254
	0.204774	0.0419322		156.076	24359.6		0.594943	0.353957		-0.923738	0.853291		0.242243	0.0586815
	0.204774	0.0419322		156.076	24359.6		0.594943	0.353957		-0.923738	0.853291		0.242243	0.0586815
	0.204774	0.0419322		156.076	24359.6		0.594943	0.353957		-0.923738	0.853291		0.242243	0.0586815
	0.207071	0.0428786		161.131	25963.2		0.600153	0.360184		-0.903779	0.816816		0.243243	0.0591671
	-0.260338	0.0677761		-142.395	20276.2		-0.53388	0.285028		-2.61419	6.834		-0.300849	0.0905101
	0.220859	0.0487785		191.465	36658.7		0.631416	0.398686		-0.784023	0.614692		0.248909	0.0619559
	-0.165984	0.0275506		-165.516	27395.6		-0.352962	0.124582		-1.76848	3.12751		-0.180755	0.0326723
	-0.0809631	0.00655503		21.5398	463.963		-0.160174	0.0256557		-1.02999	1.06087		-0.110678	0.0122496
	0.204774	0.0419322		157.076	24672.7		0.594943	0.353957		-0.636056	0.404567		0.242243	0.0586815
	-0.0694738	0.00482661		46.8176	2191.89		-0.134121	0.0179886		-0.930189	0.865252		-0.105403	0.0111098
	0.207071	0.0428786		162.131	26286.5		0.600153	0.360184		-0.616096	0.379575		0.243243	0.0591671
	-0.341423	0.11657		-58.3848	3408.78		-0.857975	0.736121		-1.20436	1.45049		-0.307763	0.094718
	0.216263	0.0467696		182.353	33252.8		0.620995	0.385635		-0.53626	0.287574		0.247081	0.061049
	0.220859	0.0487785		192.465	37042.6		0.631416	0.398686		-0.496341	0.246354		0.248909	0.0619559
	0.105966	0.0112288		-59.3136	3518.11		0.370891	0.13756		-1.27116	1.61585		0.163115	0.0266065
	-0.165984	0.0275506		-164.516	27065.5		-0.352962	0.124582		-1.54533	2.38806		-0.180755	0.0326723
	-0.152197	0.0231638		-134.183	18005		-0.321699	0.10349		-1.42558	2.03228		-0.162122	0.0262836
	-0.0809631	0.00655503		22.5398	508.042		-0.160174	0.0256557		-0.806842	0.650994		-0.110678	0.0122496
	-0.0717717	0.00515118		42.762	1828.59		-0.139332	0.0194134		-0.727005	0.528536		-0.106421	0.0113254
	0.202476	0.0409964		153.02	23415.1		0.589732	0.347784		-0.432872	0.187378		0.241225	0.0581895
	0.204774	0.0419322		158.076	24987.9		0.594943	0.353957		-0.412912	0.170496		0.242243	0.0586815
	0.204774	0.0419322		158.076	24987.9		0.594943	0.353957		-0.412912	0.170496		0.242243	0.0586815
	0.220859	0.0487785		193.465	37428.5		0.631416	0.398686		-0.273197	0.0746368		0.248909	0.0619559
	-0.168282	0.0283187		-168.572	28416.4		-0.358173	0.128288		-1.38297	1.91261		-0.184531	0.0340516
	0.204774	0.0419322		159.076	25305		0.594943	0.353957		-0.230591	0.053172		0.242243	0.0586815
	0.207071	0.0428786		164.131	26939		0.600153	0.360184		-0.210631	0.0443656		0.243243	0.0591671
	-0.165984	0.0275506		-162.516	26411.5		-0.352962	0.124582		-1.20886	1.46135		-0.180755	0.0326723
	0.108264	0.011721		-52.2581	2730.91		0.376102	0.141453		-0.914729	0.836729		0.166891	0.0278527
	-0.0717717	0.00515118		44.762	2003.64		-0.139332	0.0194134		-0.390533	0.152516		-0.106421	0.0113254
	-0.0694738	0.00482661		49.8176	2481.79		-0.134121	0.0179886		-0.370574	0.137325		-0.105403	0.0111098
	0.204774	0.0419322		160.076	25624.2		0.594943	0.353957		-0.07644	0.00584307		0.242243	0.0586815
	-0.276423	0.0764099		-173.783	30200.7		-0.570354	0.325304		-1.90661	3.63516		-0.307516	0.094566
	-0.276423	0.0764099		-173.783	30200.7		-0.570354	0.325304		-1.90661	3.63516		-0.307516	0.094566
	0.220859	0.0487785		195.465	38206.4		0.631416	0.398686		0.0632747	0.00400369		0.248909	0.0619559
	-0.165984	0.0275506		-161.516	26087.4		-0.352962	0.124582		-1.07533	1.15634		-0.180755	0.0326723
	-0.0717717	0.00515118		45.762	2094.16		-0.139332	0.0194134		-0.257001	0.0660497		-0.106421	0.0113254
	0.204774	0.0419322		161.076	25945.3		0.594943	0.353957		0.0570915	0.00325944		0.242243	0.0586815
	0.204774	0.0419322		161.076	25945.3		0.594943	0.353957		0.0570915	0.00325944		0.242243	0.0586815
	-0.0694738	0.00482661		50.8176	2582.43		-0.134121	0.0179886		-0.237042	0.056189		-0.105403	0.0111098
	-0.341423	0.11657		-54.3848	2957.71		-0.857975	0.736121		-0.511216	0.261342		-0.307763	0.094718
	0.220859	0.0487785		196.465	38598.3		0.631416	0.398686		0.196806	0.0387327		0.248909	0.0619559
	0.220859	0.0487785		196.465	38598.3		0.631416	0.398686		0.196806	0.0387327		0.248909	0.0619559
	-0.260338	0.0677761		-137.395	18877.3		-0.53388	0.285028		-1.63336	2.66787		-0.300849	0.0905101
	-0.152197	0.0231638		-130.183	16947.5		-0.321699	0.10349		-0.837792	0.701896		-0.162122	0.0262836
	0.204774	0.0419322		162.076	26268.5		0.594943	0.353957		0.174875	0.0305811		0.242243	0.0586815
	-0.0694738	0.00482661		51.8176	2685.06		-0.134121	0.0179886		-0.119259	0.0142227		-0.105403	0.0111098
	0.204774	0.0419322		162.076	26268.5		0.594943	0.353957		0.174875	0.0305811		0.242243	0.0586815
	0.220859	0.0487785		197.465	38992.2		0.631416	0.398686		0.314589	0.0989664		0.248909	0.0619559
	-0.168282	0.0283187		-164.572	27083.8		-0.358173	0.128288		-0.872147	0.76064		-0.184531	0.0340516
	-0.152197	0.0231638		-129.183	16688.2		-0.321699	0.10349		-0.732432	0.536456		-0.162122	0.0262836
	-0.0717717	0.00515118		47.762	2281.21		-0.139332	0.0194134		-0.0338578	0.00114635		-0.106421	0.0113254
	-0.0694738	0.00482661		52.8176	2789.7		-0.134121	0.0179886		-0.0138986	0.000193171		-0.105403	0.0111098
	0.204774	0.0419322		163.076	26593.6		0.594943	0.353957		0.280235	0.0785317		0.242243	0.0586815
	-0.0533889	0.00285037		88.2066	7780.4		-0.097648	0.00953514		0.125816	0.0158298		-0.0987365	0.00974889
	-0.260338	0.0677761		-135.395	18331.7		-0.53388	0.285028		-1.41022	1.98872		-0.300849	0.0905101
	-0.260338	0.0677761		-135.395	18331.7		-0.53388	0.285028		-1.41022	1.98872		-0.300849	0.0905101
	0.220859	0.0487785		198.465	39388.2		0.631416	0.398686		0.41995	0.176358		0.248909	0.0619559
	-0.165984	0.0275506		-158.516	25127.3		-0.352962	0.124582		-0.756877	0.572863		-0.180755	0.0326723
	-0.165984	0.0275506		-158.516	25127.3		-0.352962	0.124582		-0.756877	0.572863		-0.180755	0.0326723
	-0.165984	0.0275506		-158.516	25127.3		-0.352962	0.124582		-0.756877	0.572863		-0.180755	0.0326723
	-0.0809631	0.00655503		28.5398	814.52		-0.160174	0.0256557		-0.0183847	0.000337997		-0.110678	0.0122496
	0.204774	0.0419322		164.076	26920.8		0.594943	0.353957		0.375545	0.141034		0.242243	0.0586815
	0.204774	0.0419322		164.076	26920.8		0.594943	0.353957		0.375545	0.141034		0.242243	0.0586815
	0.204774	0.0419322		164.076	26920.8		0.594943	0.353957		0.375545	0.141034		0.242243	0.0586815
	-0.152197	0.0231638		-127.183	16175.4		-0.321699	0.10349		-0.55011	0.302621		-0.162122	0.0262836
	-0.0809631	0.00655503		29.5398	872.599		-0.160174	0.0256557		0.0686266	0.00470962		-0.110678	0.0122496
	-0.0809631	0.00655503		29.5398	872.599		-0.160174	0.0256557		0.0686266	0.00470962		-0.110678	0.0122496
	0.202476	0.0409964		160.02	25606.4		0.589732	0.347784		0.442597	0.195892		0.241225	0.0581895
	0.202476	0.0409964		160.02	25606.4		0.589732	0.347784		0.442597	0.195892		0.241225	0.0581895
	-0.0694738	0.00482661		54.8176	3004.97		-0.134121	0.0179886		0.168423	0.0283663		-0.105403	0.0111098
	-0.0694738	0.00482661		54.8176	3004.97		-0.134121	0.0179886		0.168423	0.0283663		-0.105403	0.0111098
	-0.276423	0.0764099		-168.783	28487.9		-0.570354	0.325304		-1.36761	1.87036		-0.307516	0.094566
	-0.165984	0.0275506		-156.516	24497.3		-0.352962	0.124582		-0.589823	0.347891		-0.180755	0.0326723
	-0.165984	0.0275506		-156.516	24497.3		-0.352962	0.124582		-0.589823	0.347891		-0.180755	0.0326723
	-0.152197	0.0231638		-126.183	15922.1		-0.321699	0.10349		-0.470068	0.220964		-0.162122	0.0262836
	-0.152197	0.0231638		-126.183	15922.1		-0.321699	0.10349		-0.470068	0.220964		-0.162122	0.0262836
	-0.0717717	0.00515118		50.762	2576.79		-0.139332	0.0194134		0.228506	0.0522151		-0.106421	0.0113254
	-0.0717717	0.00515118		50.762	2576.79		-0.139332	0.0194134		0.228506	0.0522151		-0.106421	0.0113254
	-0.0694738	0.00482661		55.8176	3115.61		-0.134121	0.0179886		0.248466	0.0617351		-0.105403	0.0111098
	-0.550671	0.303238		-278.041	77307.1		-1.29942	1.68849		-1.5817	2.50179		-0.655162	0.429237
	0.204774	0.0419322		166.076	27581.1		0.594943	0.353957		0.542599	0.294414		0.242243	0.0586815
	-1.01578	1.03182		-576.512	332366		-2.42824	5.89636		-3.27216	10.707		-0.970083	0.941061
	0.105966	0.0112288		-50.3136	2531.46		0.370891	0.13756		-0.241541	0.058342		0.163115	0.0266065
	-0.168282	0.0283187		-160.572	25783.2		-0.358173	0.128288		-0.535674	0.286947		-0.184531	0.0340516
	-0.152197	0.0231638		-125.183	15670.7		-0.321699	0.10349		-0.39596	0.156784		-0.162122	0.0262836
	0.202476	0.0409964		162.02	26250.5		0.589732	0.347784		0.596748	0.356108		0.241225	0.0581895
	-0.0694738	0.00482661		56.8176	3228.24		-0.134121	0.0179886		0.322574	0.104054		-0.105403	0.0111098
	-0.0694738	0.00482661		56.8176	3228.24		-0.134121	0.0179886		0.322574	0.104054		-0.105403	0.0111098
	0.204774	0.0419322		167.076	27914.2		0.594943	0.353957		0.616707	0.380328		0.242243	0.0586815
	0.220859	0.0487785		202.465	40991.9		0.631416	0.398686		0.756422	0.572174		0.248909	0.0619559
	-0.152197	0.0231638		-124.183	15421.3		-0.321699	0.10349		-0.326967	0.106907		-0.162122	0.0262836
	-0.0717717	0.00515118		52.762	2783.83		-0.139332	0.0194134		0.371607	0.138092		-0.106421	0.0113254
	-0.0694738	0.00482661		57.8176	3342.88		-0.134121	0.0179886		0.391567	0.153324		-0.105403	0.0111098
	-0.75762	0.573989		-499.643	249643		-1.73565	3.01248		-2.97464	8.84847		-0.629104	0.395772
	0.108264	0.011721		-43.2581	1871.26		0.376102	0.141453		-0.0880504	0.00775287		0.166891	0.0278527
	-0.276423	0.0764099		-164.783	27153.6		-0.570354	0.325304		-1.07993	1.16625		-0.307516	0.094566
	0.220859	0.0487785		204.465	41805.7		0.631416	0.398686		0.889953	0.792017		0.248909	0.0619559
	-0.152197	0.0231638		-122.183	14928.6		-0.321699	0.10349		-0.201804	0.0407247		-0.162122	0.0262836
	-0.0717717	0.00515118		54.762	2998.88		-0.139332	0.0194134		0.49677	0.246781		-0.106421	0.0113254
	-0.276423	0.0764099		-163.783	26825		-0.570354	0.325304		-1.01931	1.03898		-0.307516	0.094566
	0.220859	0.0487785		205.465	42215.7		0.631416	0.398686		0.950578	0.903598		0.248909	0.0619559
	-0.168282	0.0283187		-156.572	24514.7		-0.358173	0.128288		-0.28436	0.0808606		-0.184531	0.0340516
	-0.0717717	0.00515118		55.762	3109.41		-0.139332	0.0194134		0.553929	0.306837		-0.106421	0.0113254
	-0.0717717	0.00515118		55.762	3109.41		-0.139332	0.0194134		0.553929	0.306837		-0.106421	0.0113254
	-0.552969	0.305774		-278.097	77337.9		-1.30463	1.70206		-1.27624	1.62879		-0.656179	0.430571
	-0.165984	0.0275506		-150.516	22655.1		-0.352962	0.124582		-0.210334	0.0442402		-0.180755	0.0326723
	-0.152197	0.0231638		-120.183	14443.9		-0.321699	0.10349		-0.0905781	0.00820439		-0.162122	0.0262836
	-0.0717717	0.00515118		56.762	3221.93		-0.139332	0.0194134		0.607996	0.369659		-0.106421	0.0113254
	-0.0694738	0.00482661		63.8176	4072.69		-0.134121	0.0179886		0.728039	0.53004		-0.105403	0.0111098
	0.220859	0.0487785		209.465	43875.4		0.631416	0.398686		1.16189	1.34998		0.248909	0.0619559
	0.220859	0.0487785		209.465	43875.4		0.631416	0.398686		1.16189	1.34998		0.248909	0.0619559
	-0.152197	0.0231638		-117.183	13731.8		-0.321699	0.10349		0.0560255	0.00313886		-0.162122	0.0262836
	0.220859	0.0487785		210.465	44295.3		0.631416	0.398686		1.20841	1.46025		0.248909	0.0619559
	-0.260338	0.0677761		-123.395	15226.2		-0.53388	0.285028		-0.621762	0.386588		-0.300849	0.0905101
	-0.0717717	0.00515118		60.762	3692.03		-0.139332	0.0194134		0.799051	0.638483		-0.106421	0.0113254
	-0.0717717	0.00515118		60.762	3692.03		-0.139332	0.0194134		0.799051	0.638483		-0.106421	0.0113254
	-0.534586	0.285782		-232.653	54127.2		-1.26294	1.59503		-0.871444	0.759414		-0.648495	0.420546
	-0.260338	0.0677761		-122.395	14980.4		-0.53388	0.285028		-0.57731	0.333287		-0.300849	0.0905101
	-0.168282	0.0283187		-150.572	22671.8		-0.358173	0.128288		0.00332212	1.10365e-05		-0.184531	0.0340516
	0.220859	0.0487785		212.465	45141.2		0.631416	0.398686		1.29542	1.67811		0.248909	0.0619559
	-0.0717717	0.00515118		62.762	3939.07		-0.139332	0.0194134		0.882433	0.778688		-0.106421	0.0113254
	-0.0533889	0.00285037		103.207	10651.6		-0.097648	0.00953514		1.04211	1.08599		-0.0987365	0.00974889
	-0.260338	0.0677761		-120.395	14494.9		-0.53388	0.285028		-0.493929	0.243966		-0.300849	0.0905101
	0.105966	0.0112288		-38.3136	1467.93		0.370891	0.13756		0.377498	0.142505		0.163115	0.0266065
	-0.168282	0.0283187		-148.572	22073.5		-0.358173	0.128288		0.0833647	0.00694968		-0.184531	0.0340516
	-0.276423	0.0764099		-154.783	23957.9		-0.570354	0.325304		-0.594423	0.353338		-0.307516	0.094566
	-0.168282	0.0283187		-147.572	21777.4		-0.358173	0.128288		0.121105	0.0146665		-0.184531	0.0340516
	-0.426444	0.181855		-222.441	49479.8		-1.05076	1.1041		-0.0333135	0.00110979		-0.365482	0.133577
	0.207071	0.0428786		185.131	34273.5		0.600153	0.360184		1.29345	1.673		0.243243	0.0591671
	-0.264934	0.0701901		-128.506	16513.7		-0.544302	0.296264		-0.456886	0.208745		-0.302678	0.0916137
	0.202476	0.0409964		176.02	30983		0.589732	0.347784		1.2899	1.66383		0.241225	0.0581895
	-0.550671	0.303238		-263.041	69190.8		-1.29942	1.68849		-0.814448	0.663326		-0.655162	0.429237
	-0.152197	0.0231638		-110.183	12140.2		-0.321699	0.10349		0.332279	0.110409		-0.162122	0.0262836
	-0.534586	0.285782		-225.653	50919.1		-1.26294	1.59503		-0.605741	0.366922		-0.648495	0.420546
	-0.165984	0.0275506		-138.516	19186.7		-0.352962	0.124582		0.279215	0.0779608		-0.180755	0.0326723
	-0.152197	0.0231638		-107.183	11488.1		-0.321699	0.10349		0.430719	0.185519		-0.162122	0.0262836
	-0.0717717	0.00515118		69.762	4866.74		-0.139332	0.0194134		1.12929	1.2753		-0.106421	0.0113254
	-0.0717717	0.00515118		69.762	4866.74		-0.139332	0.0194134		1.12929	1.2753		-0.106421	0.0113254
	-0.0717717	0.00515118		69.762	4866.74		-0.139332	0.0194134		1.12929	1.2753		-0.106421	0.0113254
	-0.165984	0.0275506		-136.516	18636.6		-0.352962	0.124582		0.341735	0.116783		-0.180755	0.0326723
	0.105966	0.0112288		-30.3136	918.916		0.370891	0.13756		0.645762	0.417009		0.163115	0.0266065
	-0.260338	0.0677761		-111.395	12408.7		-0.53388	0.285028		-0.186444	0.0347614		-0.300849	0.0905101
	-0.168282	0.0283187		-139.572	19480.2		-0.358173	0.128288		0.380616	0.144869		-0.184531	0.0340516
	-0.372933	0.139079		-358.117	128248		-0.789195	0.622828		-1.13546	1.28927		-0.382867	0.146587
	-0.0717717	0.00515118		73.762	5440.84		-0.139332	0.0194134		1.24708	1.5552		-0.106421	0.0113254
	-0.552969	0.305774		-260.097	67650.5		-1.30463	1.70206		-0.583093	0.339998		-0.656179	0.430571
	-0.276423	0.0764099		-144.783	20962.3		-0.570354	0.325304		-0.269	0.0723612		-0.307516	0.094566
	-0.534586	0.285782		-219.653	48247.2		-1.26294	1.59503		-0.423419	0.179284		-0.648495	0.420546
	0.105966	0.0112288		-27.3136	746.034		0.370891	0.13756		0.730319	0.533367		0.163115	0.0266065
	-0.0717717	0.00515118		74.762	5589.36		-0.139332	0.0194134		1.27447	1.62429		-0.106421	0.0113254
	-0.0533889	0.00285037		115.207	13272.5		-0.097648	0.00953514		1.43415	2.05678		-0.0987365	0.00974889
	-0.260338	0.0677761		-108.395	11749.4		-0.53388	0.285028		-0.101887	0.0103809		-0.300849	0.0905101
	0.204774	0.0419322		191.076	36509.9		0.594943	0.353957		1.61524	2.60899		0.242243	0.0586815
	-0.375231	0.140798		-359.173	129005		-0.794405	0.63108		-1.04721	1.09664		-0.386643	0.149493
	-0.372933	0.139079		-353.117	124692		-0.789195	0.622828		-1.00193	1.00386		-0.382867	0.146587
	0.220859	0.0487785		229.465	52654		0.631416	0.398686		1.83094	3.35233		0.248909	0.0619559
	-0.276423	0.0764099		-137.783	18984.3		-0.570354	0.325304		-0.0913191	0.00833918		-0.307516	0.094566
	-0.274126	0.0751448		-131.728	17352.2		-0.565143	0.319387		-0.0483704	0.00233969		-0.306516	0.0939518
	-0.152197	0.0231638		-94.1826	8870.37		-0.321699	0.10349		0.771646	0.595437		-0.162122	0.0262836
	-0.552969	0.305774		-251.097	63049.7		-1.30463	1.70206		-0.35995	0.129564		-0.656179	0.430571
	-0.534586	0.285782		-209.653	43954.2		-1.26294	1.59503		-0.178297	0.0317897		-0.648495	0.420546
	-0.375231	0.140798		-351.173	123322		-0.794405	0.63108		-0.86062	0.740666		-0.386643	0.149493
	-0.372933	0.139079		-346.117	119797		-0.789195	0.622828		-0.840661	0.706711		-0.382867	0.146587
	-0.276423	0.0764099		-132.783	17631.5		-0.570354	0.325304		0.0186818	0.000349008		-0.307516	0.094566
	-0.260338	0.0677761		-97.3946	9485.7		-0.53388	0.285028		0.158396	0.0250894		-0.300849	0.0905101
	-0.276423	0.0764099		-131.783	17366.9		-0.570354	0.325304		0.0393009	0.00154456		-0.307516	0.094566
	-0.274126	0.0751448		-125.728	15807.5		-0.565143	0.319387		0.079463	0.00631437		-0.306516	0.0939518
	0.108264	0.011721		-8.25806	68.1956		0.376102	0.141453		1.07119	1.14744		0.166891	0.0278527
	-0.165984	0.0275506		-115.516	13344		-0.352962	0.124582		0.834212	0.695909		-0.180755	0.0326723
	-0.633394	0.401188		-419.042	175596		-1.487	2.21116		-0.876202	0.76773		-0.711881	0.506774
	-0.633394	0.401188		-419.042	175596		-1.487	2.21116		-0.876202	0.76773		-0.711881	0.506774
	-0.375231	0.140798		-343.173	117768		-0.794405	0.63108		-0.703434	0.494819		-0.386643	0.149493
	-0.552969	0.305774		-240.097	57646.6		-1.30463	1.70206		-0.141261	0.0199546		-0.656179	0.430571
	-0.278721	0.0776856		-129.839	16858.2		-0.575565	0.331274		0.152873	0.0233702		-0.308533	0.0951928
	-0.260338	0.0677761		-87.3946	7637.81		-0.53388	0.285028		0.347638	0.120852		-0.300849	0.0905101
	-0.276423	0.0764099		-121.783	14831.2		-0.570354	0.325304		0.225018	0.0506332		-0.307516	0.094566
	-0.550671	0.303238		-232.041	53843.2		-1.29942	1.68849		-0.0691152	0.00477691		-0.655162	0.429237
	-0.534586	0.285782		-195.653	38279.9		-1.26294	1.59503		0.0874066	0.00763992		-0.648495	0.420546
	-0.168282	0.0283187		-110.572	12226.1		-0.358173	0.128288		0.984151	0.968554		-0.184531	0.0340516
	0.204774	0.0419322		217.076	47121.8		0.594943	0.353957		2.13653	4.56477		0.242243	0.0586815
	-0.260338	0.0677761		-81.3946	6625.07		-0.53388	0.285028		0.446079	0.198986		-0.300849	0.0905101
	0.220859	0.0487785		252.465	63738.3		0.631416	0.398686		2.27625	5.1813		0.248909	0.0619559
	-0.165984	0.0275506		-104.516	10923.6		-0.352962	0.124582		1.01961	1.03961		-0.180755	0.0326723
	-0.552969	0.305774		-231.097	53405.8		-1.30463	1.70206		0.00777531	6.04554e-05		-0.656179	0.430571
	-1.29003	1.66418		-634.77	402932		-3.15731	9.96858		-1.95685	3.82928		-1.17344	1.37697
	-0.276423	0.0764099		-112.783	12720.1		-0.570354	0.325304		0.366988	0.134681		-0.307516	0.094566
	-0.375231	0.140798		-329.173	108355		-0.794405	0.63108		-0.476661	0.227205		-0.386643	0.149493
	-0.552969	0.305774		-227.097	51573.1		-1.30463	1.70206		0.0674944	0.00455549		-0.656179	0.430571
	-0.278721	0.0776856		-116.839	13651.4		-0.575565	0.331274		0.361628	0.130775		-0.308533	0.0951928
	0.105966	0.0112288		5.68637	32.3348		0.370891	0.13756		1.3679	1.87114		0.163115	0.0266065
	-0.168282	0.0283187		-104.572	10935.2		-0.358173	0.128288		1.07376	1.15297		-0.184531	0.0340516
	-0.0717717	0.00515118		107.762	11612.7		-0.139332	0.0194134		1.91205	3.65594		-0.106421	0.0113254
	-0.278721	0.0776856		-115.839	13418.7		-0.575565	0.331274		0.376017	0.141388		-0.308533	0.0951928
	-0.278721	0.0776856		-115.839	13418.7		-0.575565	0.331274		0.376017	0.141388		-0.308533	0.0951928
	-0.276423	0.0764099		-110.783	12273		-0.570354	0.325304		0.395976	0.156797		-0.307516	0.094566
	-0.375231	0.140798		-327.173	107042		-0.794405	0.63108		-0.448087	0.200782		-0.386643	0.149493
	-0.552969	0.305774		-225.097	50668.7		-1.30463	1.70206		0.0960679	0.00922904		-0.656179	0.430571
	-0.375231	0.140798		-326.173	106389		-0.794405	0.63108		-0.434101	0.188444		-0.386643	0.149493
	-0.633394	0.401188		-401.042	160834		-1.487	2.21116		-0.58852	0.346356		-0.711881	0.506774
	-0.276423	0.0764099		-108.783	11833.8		-0.570354	0.325304		0.424147	0.179901		-0.307516	0.094566
	-0.260338	0.0677761		-73.3946	5386.76		-0.53388	0.285028		0.563862	0.31794		-0.300849	0.0905101
	-0.152197	0.0231638		-66.1826	4380.14		-0.321699	0.10349		1.25544	1.57614		-0.162122	0.0262836
	-0.552969	0.305774		-221.097	48883.9		-1.30463	1.70206		0.150876	0.0227636		-0.656179	0.430571
	0.105966	0.0112288		11.6864	136.571		0.370891	0.13756		1.45013	2.10289		0.163115	0.0266065
	-0.0717717	0.00515118		113.762	12941.8		-0.139332	0.0194134		1.99429	3.97719		-0.106421	0.0113254
	-0.260338	0.0677761		-69.3946	4815.61		-0.53388	0.285028		0.617929	0.381836		-0.300849	0.0905101
	-0.260338	0.0677761		-69.3946	4815.61		-0.53388	0.285028		0.617929	0.381836		-0.300849	0.0905101
	-0.276423	0.0764099		-103.783	10771		-0.570354	0.325304		0.491286	0.241362		-0.307516	0.094566
	-1.29003	1.66418		-622.77	387842		-3.15731	9.96858		-1.78744	3.19493		-1.17344	1.37697
	-0.165984	0.0275506		-90.516	8193.15		-0.352962	0.124582		1.21468	1.47544		-0.180755	0.0326723
	-0.534586	0.285782		-176.653	31206.1		-1.26294	1.59503		0.36251	0.131413		-0.648495	0.420546
	-0.375231	0.140798		-317.173	100599		-0.794405	0.63108		-0.316318	0.100057		-0.386643	0.149493
	-0.552969	0.305774		-214.097	45837.5		-1.30463	1.70206		0.240107	0.0576514		-0.656179	0.430571
	-0.276423	0.0764099		-98.7835	9758.18		-0.570354	0.325304		0.5542	0.307138		-0.307516	0.094566
	-0.276423	0.0764099		-97.7835	9561.61		-0.570354	0.325304		0.566321	0.32072		-0.307516	0.094566
	-0.375231	0.140798		-314.173	98704.5		-0.794405	0.63108		-0.279951	0.0783723		-0.386643	0.149493
	0.204774	0.0419322		238.076	56680		0.594943	0.353957		2.4203	5.85786		0.242243	0.0586815
	-0.278721	0.0776856		-99.8391	9967.84		-0.575565	0.331274		0.581869	0.338571		-0.308533	0.0951928
	0.108264	0.011721		27.7419	769.615		0.376102	0.141453		1.60527	2.57689		0.166891	0.0278527
	-0.343721	0.118144		20.5596	422.699		-0.863186	0.745089		1.86672	3.48464		-0.308763	0.0953346
	-0.534586	0.285782		-166.653	27773.1		-1.26294	1.59503		0.481699	0.232033		-0.648495	0.420546
	-0.647181	0.418843		-413.375	170879		-1.51826	2.30511		-0.485132	0.235353		-0.730513	0.533649
	-0.633394	0.401188		-381.042	145193		-1.487	2.21116		-0.343398	0.117922		-0.711881	0.506774
	-1.03417	1.0695		-536.956	288322		-2.46993	6.10053		-1.46418	2.14383		-0.977767	0.956029
	-1.03417	1.0695		-536.956	288322		-2.46993	6.10053		-1.46418	2.14383		-0.977767	0.956029
	-0.260338	0.0677761		-50.3946	2539.61		-0.53388	0.285028		0.841072	0.707403		-0.300849	0.0905101
	-0.375231	0.140798		-301.173	90705		-0.794405	0.63108		-0.136056	0.0185114		-0.386643	0.149493
	-0.375231	0.140798		-299.173	89504.3		-0.794405	0.63108		-0.115647	0.0133743		-0.386643	0.149493
	-0.276423	0.0764099		-81.7835	6688.54		-0.570354	0.325304		0.742601	0.551456		-0.307516	0.094566
	-0.0694738	0.00482661		141.818	20112.2		-0.134121	0.0179886		2.27864	5.19218		-0.105403	0.0111098
	0.417047	0.173928		-80.7835	6525.97		0.429646	0.184596		0.752651	0.566483		0.385954	0.148961
	0.0462893	0.0021427		-402.375	161906		-0.518259	0.268592		-0.369821	0.136768		-0.0370432	0.0013722
	0.527486	0.278242		-67.516	4558.41		0.647038	0.418658		1.4702	2.16149		0.512715	0.262877
	0.623996	0.389371		144.818	20972.1		0.865879	0.749746		2.30849	5.32912		0.588067	0.345823
	0.417047	0.173928		-73.7835	5444		0.429646	0.184596		0.820309	0.672908		0.385954	0.148961
	0.318239	0.101276		-288.173	83043.5		0.205595	0.0422692		-0.0102868	0.000105818		0.306827	0.0941426
	0.621698	0.386509		148.762	22130.1		0.860668	0.74075		2.37309	5.63154		0.587049	0.344627
	0.621698	0.386509		148.762	22130.1		0.860668	0.74075		2.37309	5.63154		0.587049	0.344627
	0.318239	0.101276		-286.173	81894.8		0.205595	0.0422692		0.00773144	5.97751e-05		0.306827	0.0941426
	0.417047	0.173928		-66.7835	4460.03		0.429646	0.184596		0.883679	0.780889		0.385954	0.148961
	0.158884	0.0252442		-141.653	20065.4		-0.262945	0.0691399		0.72926	0.531821		0.0449751	0.00202276
	0.318239	0.101276		-283.173	80186.8		0.205595	0.0422692		0.0341649	0.00116724		0.306827	0.0941426
	0.320537	0.102744		-277.117	76793.9		0.210805	0.0444388		0.0627818	0.00394156		0.310603	0.0964741
	0.318239	0.101276		-276.173	76271.4		0.205595	0.0422692		0.0932536	0.00869624		0.306827	0.0941426
	0.417047	0.173928		-56.7835	3224.37		0.429646	0.184596		0.967762	0.936564		0.385954	0.148961
	0.158884	0.0252442		-130.653	17070.1		-0.262945	0.0691399		0.821376	0.674658		0.0449751	0.00202276
	0.158884	0.0252442		-128.653	16551.5		-0.262945	0.0691399		0.837249	0.700986		0.0449751	0.00202276
	0.417047	0.173928		-51.7835	2681.53		0.429646	0.184596		1.00729	1.01464		0.385954	0.148961
	0.801734	0.642777		70.7419	5004.42		1.3761	1.89366		2.0069	4.02763		0.860361	0.740221
	0.414749	0.172016		-53.8391	2898.64		0.424435	0.180145		1.01032	1.02075		0.384937	0.148176
	0.142799	0.0203916		-158.041	24977.1		-0.299418	0.0896511		0.743696	0.553084		0.0383083	0.00146753
	0.318239	0.101276		-254.173	64603.8		0.205595	0.0422692		0.259046	0.0671049		0.306827	0.0941426
	0.417047	0.173928		-18.7835	352.82		0.429646	0.184596		1.23508	1.52542		0.385954	0.148961
	0.527486	0.278242		-3.51602	12.3624		0.647038	0.418658		1.95722	3.83069		0.512715	0.262877
	0.417047	0.173928		-13.7835	189.985		0.429646	0.184596		1.26547	1.60143		0.385954	0.148961
	0.417047	0.173928		-13.7835	189.985		0.429646	0.184596		1.26547	1.60143		0.385954	0.148961
	0.158884	0.0252442		-87.6525	7682.97		-0.262945	0.0691399		1.11703	1.24775		0.0449751	0.00202276
	0.158884	0.0252442		-79.6525	6344.53		-0.262945	0.0691399		1.16355	1.35384		0.0449751	0.00202276
	0.318239	0.101276		-216.173	46730.6		0.205595	0.0422692		0.493239	0.243285		0.306827	0.0941426
	0.417047	0.173928		5.21651	27.2119		0.429646	0.184596		1.37323	1.88575		0.385954	0.148961
	0.525188	0.275823		12.4284	154.465		0.641827	0.411942		2.05638	4.22869		0.508939	0.259019
	0.142799	0.0203916		-104.041	10824.6		-0.299418	0.0896511		1.08446	1.17604		0.0383083	0.00146753
	0.158884	0.0252442		-64.6525	4179.95		-0.262945	0.0691399		1.24534	1.55086		0.0449751	0.00202276
	0.451431	0.20379		-300.375	90225.2		0.481741	0.232075		0.328265	0.107758		0.368099	0.135497
	0.723381	0.52328		-194.173	37703		1.20559	1.45346		0.607353	0.368877		0.711969	0.506899
	-0.191418	0.036641		-495.77	245787		-1.15731	1.33936		-0.813121	0.661166		-0.0748308	0.00559964
	-0.191418	0.036641		-471.77	222566		-1.15731	1.33936		-0.701895	0.492657		-0.0748308	0.00559964
	0.723381	0.52328		-167.173	27946.7		1.20559	1.45346		0.73165	0.535312		0.711969	0.506899
	-0.205205	0.0421093		-495.103	245127		-1.18857	1.41269		-0.79141	0.62633		-0.0804974	0.00647983
	0.725679	0.526609		-157.117	24685.8		1.21081	1.46605		0.773024	0.597565		0.715745	0.51229
	0.754891	0.56986		177.56	31527.4		1.13681	1.29235		2.89064	8.35581		0.789849	0.623861
	-0.191418	0.036641		-451.77	204096		-1.15731	1.33936		-0.617812	0.381692		-0.0748308	0.00559964
	0.451431	0.20379		-249.375	62187.9		0.481741	0.232075		0.552393	0.305138		0.368099	0.135497
	-0.191418	0.036641		-434.77	189025		-1.15731	1.33936		-0.551511	0.304164		-0.0748308	0.00559964
	0.564026	0.318125		12.3475	152.46		0.737055	0.543251		1.58405	2.50921		0.450117	0.202605
	-0.191418	0.036641		-424.77	180429		-1.15731	1.33936		-0.51447	0.264679		-0.0748308	0.00559964
	-0.191418	0.036641		-403.77	163030		-1.15731	1.33936		-0.440881	0.194376		-0.0748308	0.00559964
	-0.191418	0.036641		-402.77	162223		-1.15731	1.33936		-0.437509	0.191414		-0.0748308	0.00559964
	0.0962636	0.00926669		-399.77	159816		-0.157305	0.0247449		-0.427458	0.182721		0.212851	0.0453057
	0.0962636	0.00926669		-398.77	159017		-0.157305	0.0247449		-0.42413	0.179887		0.212851	0.0453057
	0.0962636	0.00926669		-398.77	159017		-0.157305	0.0247449		-0.42413	0.179887		0.212851	0.0453057
	0.739113	0.546288		-193.375	37393.9		1.48174	2.19556		0.751631	0.564949		0.655781	0.430049
	0.0962636	0.00926669		-384.77	148048		-0.157305	0.0247449		-0.378668	0.14339		0.212851	0.0453057
	0.0962636	0.00926669		-374.77	140452		-0.157305	0.0247449		-0.347415	0.120697		0.212851	0.0453057
	1.33291	1.77664		405.207	164192		2.90235	8.42365		3.61319	13.0552		1.28756	1.6578
	0.0640937	0.004108		-420.547	176860		-0.230252	0.0530161		-0.552737	0.305518		0.198659	0.0394655
	0.0640937	0.004108		-410.547	168549		-0.230252	0.0530161		-0.524566	0.27517		0.198659	0.0394655
	0.0962636	0.00926669		-306.77	94107.5		-0.157305	0.0247449		-0.157431	0.0247846		0.212851	0.0453057
	0.0962636	0.00926669		-305.77	93495		-0.157305	0.0247449		-0.15489	0.0239909		0.212851	0.0453057
	0.287238	0.0825055		-370.547	137305		0.769748	0.592512		-0.419206	0.175733		0.421803	0.177918
	0.593655	0.352426		-149.512	22353.7		1.57176	2.47043		0.249668	0.0623339		0.639355	0.408775
	0.319408	0.102021		-249.77	62384.8		0.842695	0.710134		-0.0219932	0.000483699		0.435995	0.190092
	0.319408	0.102021		-243.77	59423.6		0.842695	0.710134		-0.00874805	7.65285e-05		0.435995	0.190092
	0.319408	0.102021		-236.77	56059.8		0.842695	0.710134		0.00648642	4.20736e-05		0.435995	0.190092
	0.319408	0.102021		-230.77	53254.6		0.842695	0.710134		0.019362	0.000374886		0.435995	0.190092
	0.319408	0.102021		-217.77	47423.6		0.842695	0.710134		0.0467033	0.0021812		0.435995	0.190092
	0.593655	0.352426		-94.5116	8932.44		1.57176	2.47043		0.367451	0.13502		0.639355	0.408775
	0.501729	0.251732		-110.77	12269.9		1.84269	3.39552		0.247185	0.0611005		0.618316	0.382315
	0.501729	0.251732		-76.7695	5893.56		1.84269	3.39552		0.303306	0.0919943		0.618316	0.382315
	0.759891	0.577435		93.0995	8667.51		2.53529	6.42767		0.599648	0.359577		0.815009	0.66424
	0.469559	0.220485		-45.5474	2074.57		1.76975	3.13201		0.175501	0.0308007		0.604124	0.364966
	0.501729	0.251732		54.2305	2940.94		1.84269	3.39552		0.494152	0.244186		0.618316	0.382315
	0.501729	0.251732		136.23	18558.7		1.84269	3.39552		0.597388	0.356872		0.618316	0.382315
	0.469559	0.220485		99.4526	9890.81		1.76975	3.13201		0.357823	0.128037		0.604124	0.364966
	0.469559	0.220485		229.453	52648.5		1.76975	3.13201		0.497085	0.247094		0.604124	0.364966
	1.14458	1.31006		497.625	247631		3.48174	12.1225		1.92381	3.70106		1.06125	1.12624
	0.469559	0.220485		369.453	136495		1.76975	3.13201		0.628113	0.394526		0.604124	0.364966
	0.501729	0.251732		502.23	252235		1.84269	3.39552		0.960501	0.922563		0.618316	0.382315
	0.469559	0.220485		499.453	249453		1.76975	3.13201		0.736102	0.541846		0.604124	0.364966
	0.501729	0.251732		682.23	465438		1.84269	3.39552		1.10005	1.2101		0.618316	0.382315
	0.469559	0.220485		639.453	408900		1.76975	3.13201		0.840675	0.706734		0.604124	0.364966
	0.469559	0.220485		649.453	421789		1.76975	3.13201		0.847742	0.718667		0.604124	0.364966
	0.677168	0.458557		686.099	470732		2.34771	5.51173		0.613187	0.375999		0.75829	0.575004
	1.25717	1.58048		1279.35	1.63673e+06		3.73706	13.9656		3.32935	11.0846		1.14326	1.30705
	0.469559	0.220485		852.453	726675		1.76975	3.13201		0.981361	0.96307		0.604124	0.364966
	0.677168	0.458557		980.099	960594		2.34771	5.51173		0.792938	0.628751		0.75829	0.575004
	0.469559	0.220485		1189.45	1.4148e+06		1.76975	3.13201		1.17003	1.36897		0.604124	0.364966
	0.469559	0.220485		1589.45	2.52636e+06		1.76975	3.13201		1.35575	1.83805		0.604124	0.364966
	0.677168	0.458557		2140.1	4.58002e+06		2.34771	5.51173		1.29319	1.67233		0.75829	0.575004
	1.14458	1.31006		2473.62	6.11882e+06		3.48174	12.1225		3.01373	9.08257		1.06125	1.12624
	0.677168	0.458557		9183.1	8.43293e+07		2.34771	5.51173		2.51398	6.32012		1.06125	1.12624
suma kwadratów reszt		46.709			1.18595e+08			301.155			436.991			53.4396
		3.84394						5.70763						3.97855
AIC		1341.53						1991.96						1388.51
